# Supplementary material
Source: publisher figshare collection journal article supplement (https://acs.figshare.com/ndownloader/files/9950578)
Supplement: Supplementary file 1 [file 9950578]

**SUPPORTING INFORMATION FOR:**

**Recyclable nanocomposite of flowerlike  
MoS<sub>2</sub>@hybrid acid-doped PANI immobilized on  
porous PAN nanofibers for the efficient removal of Cr  
(VI)**

Jinli Qiu<sup>†</sup>, Fuqiang Liu<sup>\*†,‡</sup>, Song Cheng<sup>†</sup>, Lidan Zong<sup>†</sup>, Changqing Zhu<sup>†</sup>, Chen Ling<sup>†</sup>,  
Aimin Li<sup>†,‡</sup>

<sup>†</sup>State Key Laboratory of Pollution Control and Resources Reuse, School of the  
Environment, Nanjing University, Nanjing 210023, P.R. China

<sup>‡</sup>State Environmental Protection Engineering Center for Organic Chemical Industrial  
Waste Water Disposal Resource Reuse, Nanjing 210023, P. R. China

15 pages, 14 figures, 7 tables

\*To whom correspondence should be addressed: jogia@163.com

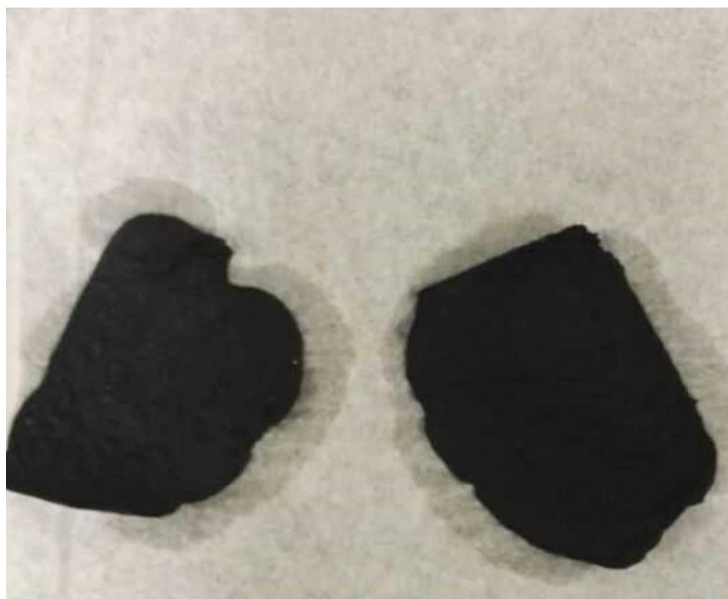

**Figure S1.** The physical appearance of the prepared MoS<sub>2</sub>@PANI/PAN nanocomposite.

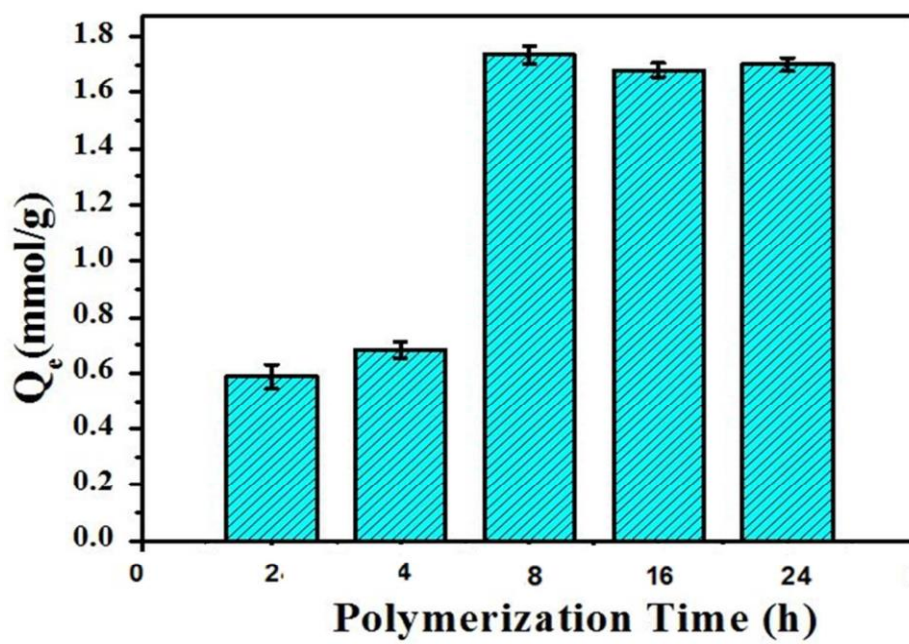

**Figure S2.** The effect of the polymerization time on the Cr(VI) removal capacity of the nanocomposite.

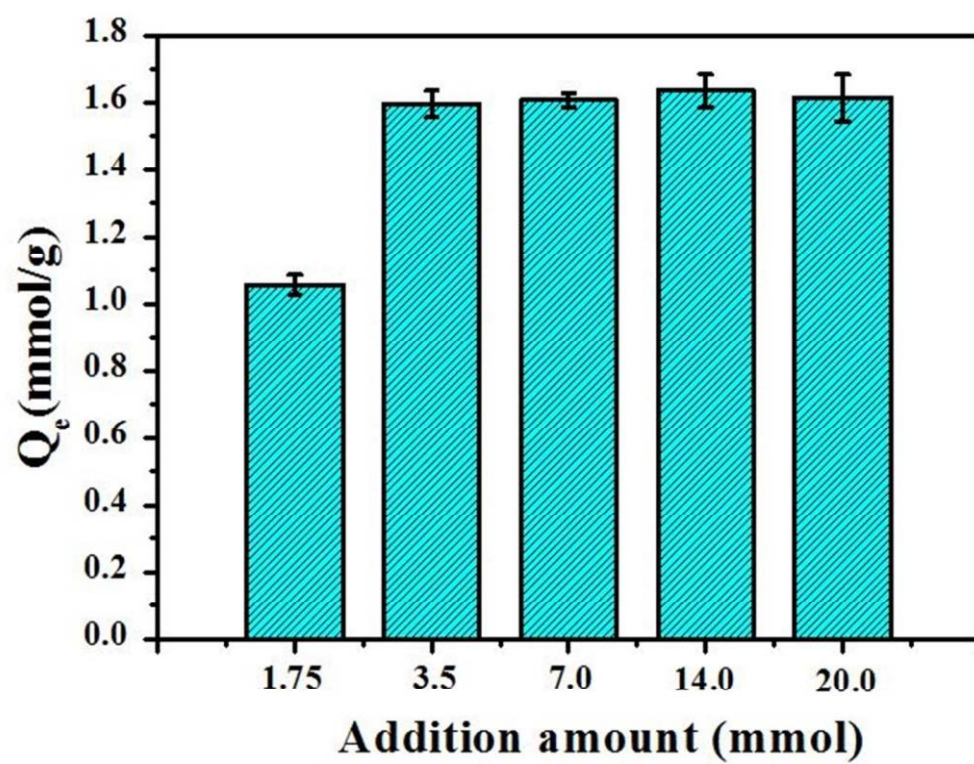

**Figure S3.** The effect of the added amount of APS on MoS<sub>2</sub>@PANI/PAN polymerization and the Cr(VI) removal capacity.

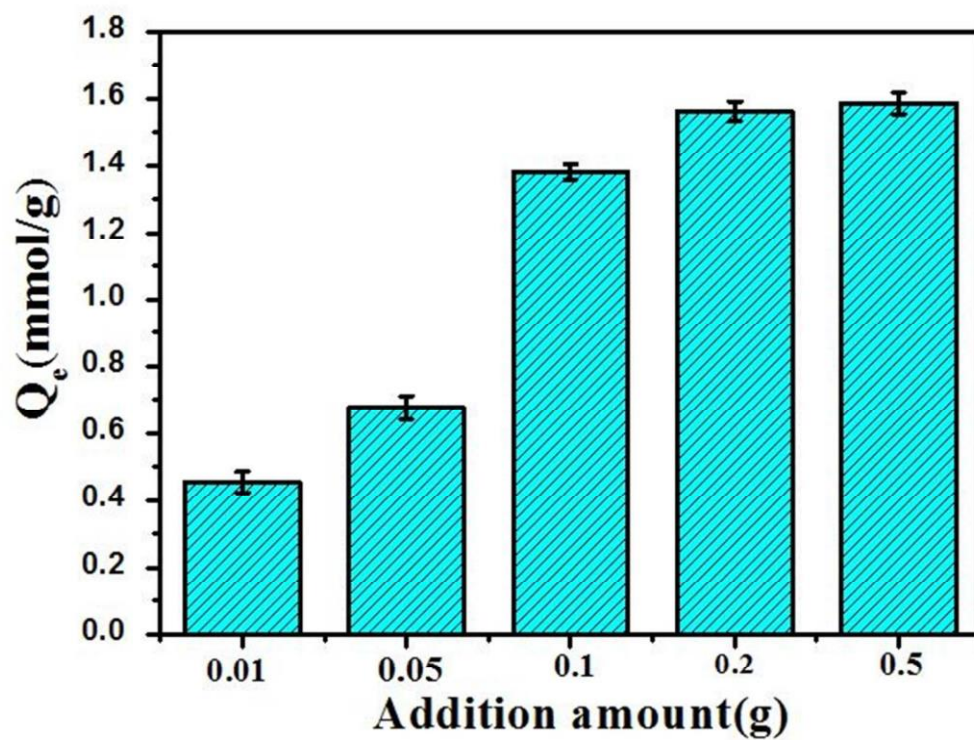

**Figure S4.** The effect of the added amount of MoS<sub>2</sub> on MoS<sub>2</sub>@PANI/PAN polymerization and the Cr(VI) removal capacity.

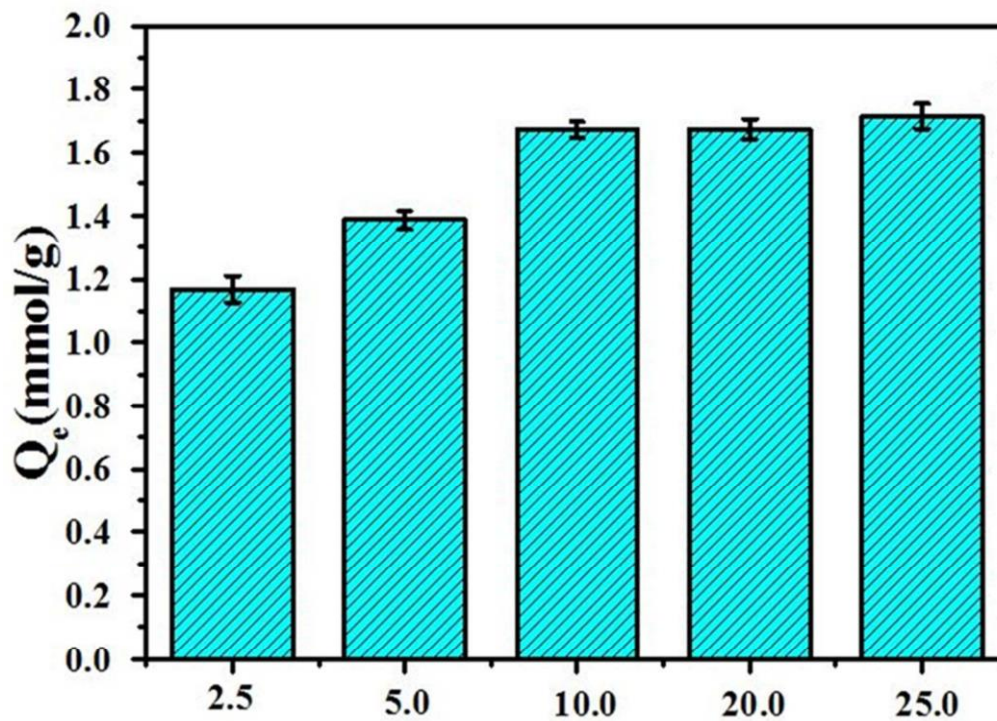

**Figure S5.** The effect of the added amount of aniline on MoS<sub>2</sub>@PANI/PAN polymerization and the Cr(VI) removal capacity.

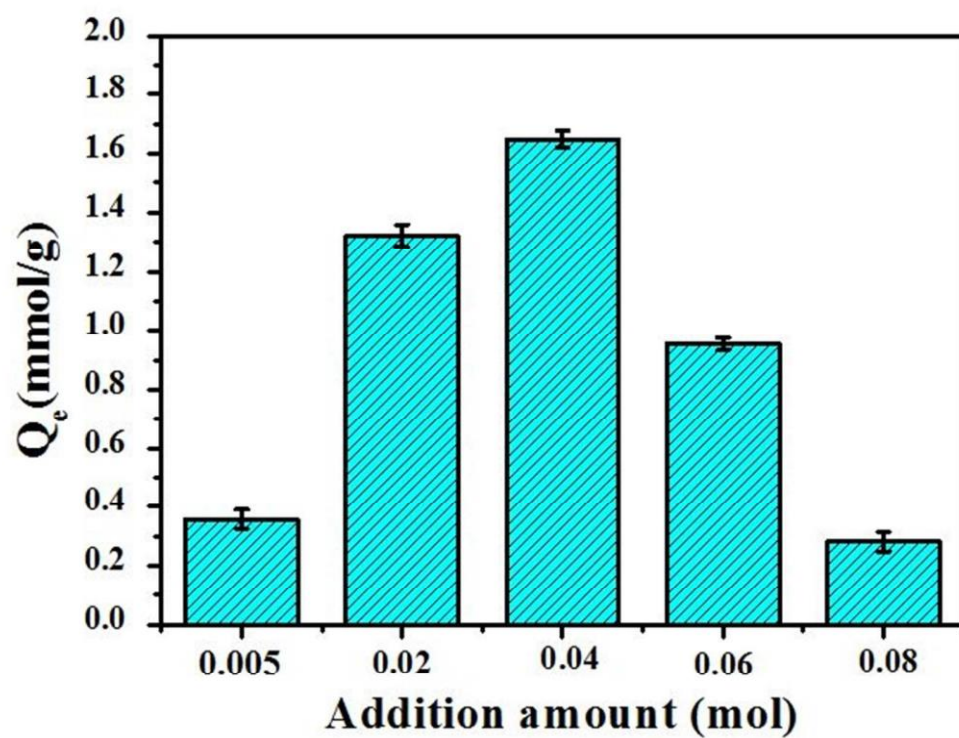

**Figure S6.** The effect of the added amount of TSA on MoS<sub>2</sub>@PANI/PAN polymerization and the Cr(VI) removal capacity.



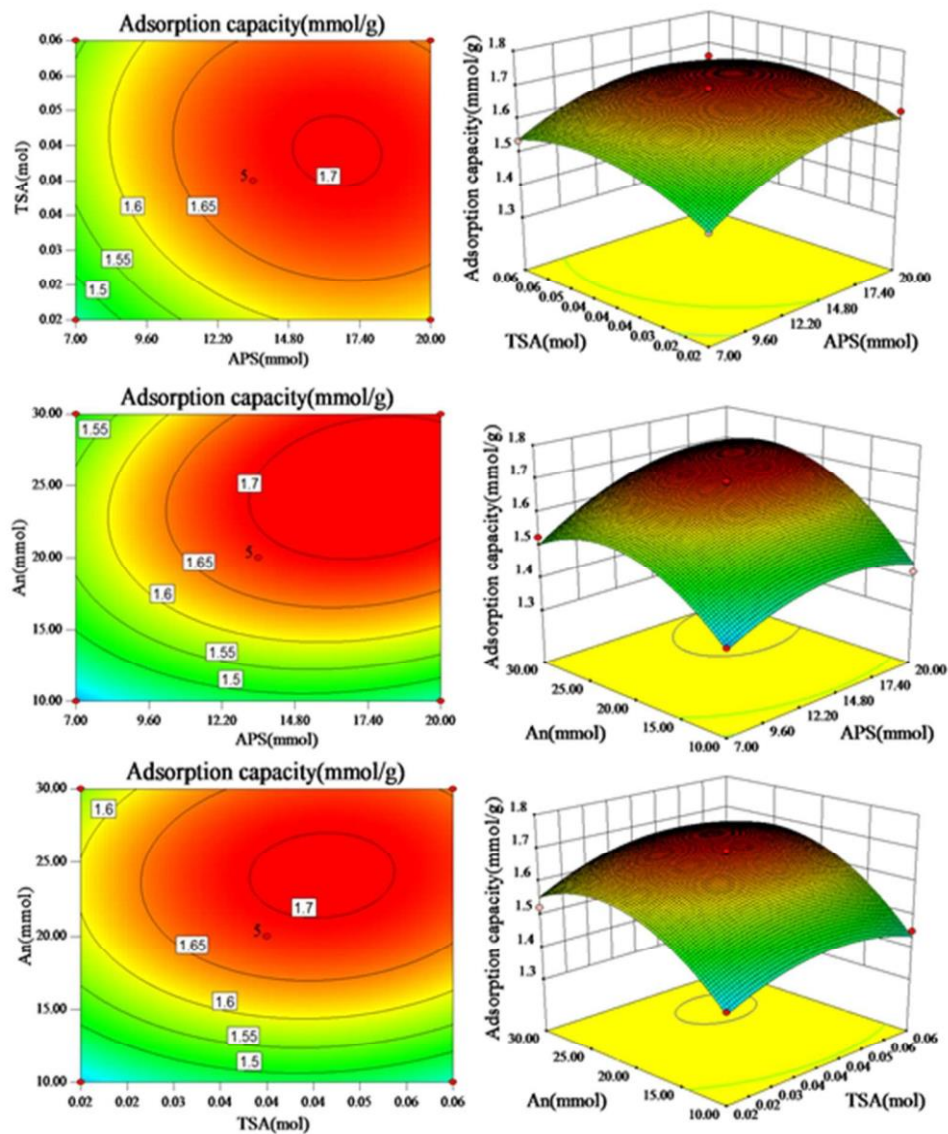

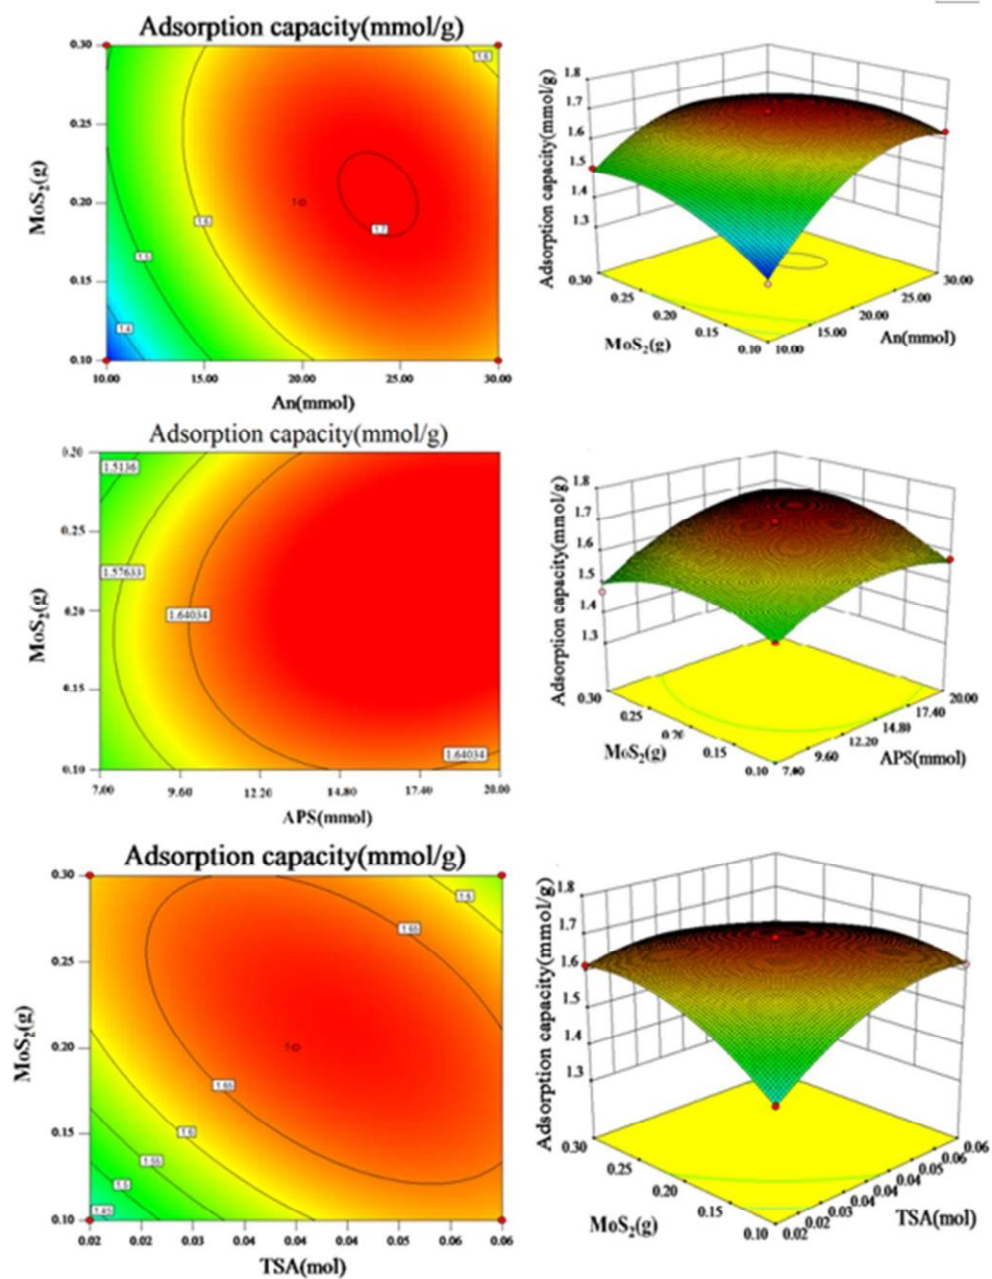

**Figure S7.** Contour maps and response surfaces for Cr(VI) removal.

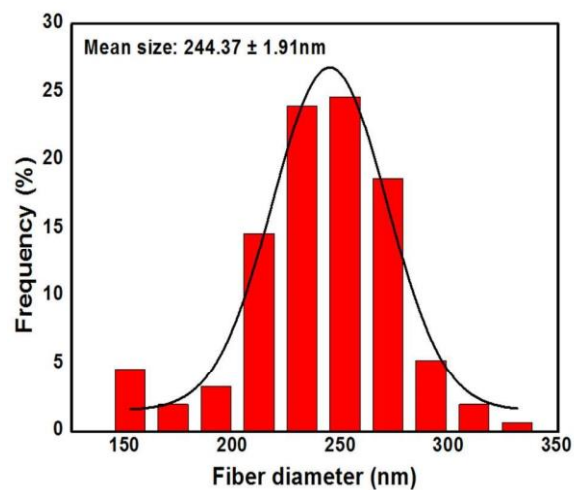

**Figure S8.** The diameter distribution of pure PAN nanofibers.

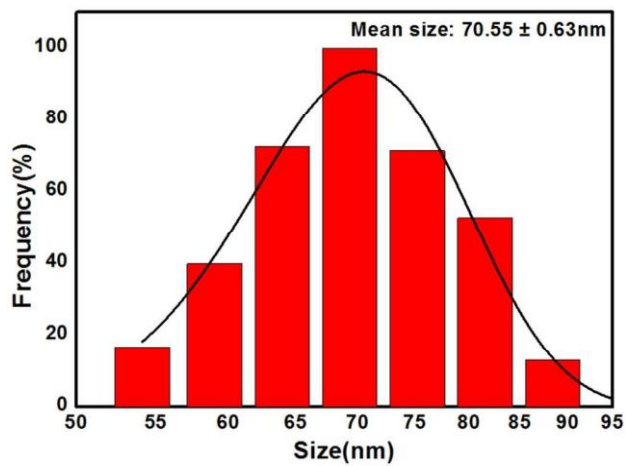

**Figure S9.** The diameter distribution of pure MoS<sub>2</sub> nanoparticles.

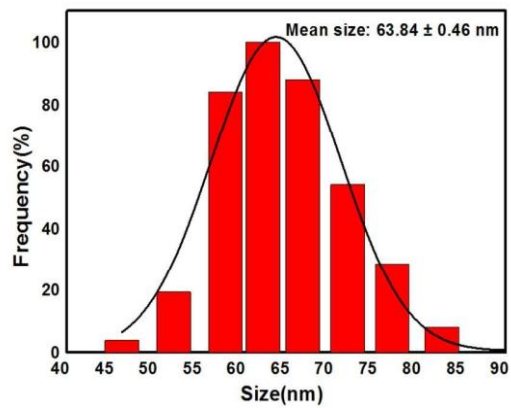

**Figure S10.** The diameter distribution of pure PANI nanoparticles.



**Table S1.** The specific surface area of the obtained materials and information on their porous

| Properties                              | texture                     |                   |                            |                       |
|-----------------------------------------|-----------------------------|-------------------|----------------------------|-----------------------|
|                                         | Bare PAN                    | Bare porous       | MoS <sub>2</sub> @PANI/PAN | Pure MoS <sub>2</sub> |
|                                         | nanofibers without<br>pores | PAN<br>nanofibers | nanocomposite              | nanoparticles         |
| BET surface area<br>(m <sup>2</sup> /g) | 21.52                       | 13.99             | 27.06                      | 10.89                 |
| Average pore<br>Diameter (nm)           | 4.36                        | 7.39              | 10.14                      | 13.08                 |
| Pore<br>volume(cm <sup>3</sup> /g)      | 0.023                       | 0.026             | 0.069                      | 0.036                 |

**Table S2.** The mechanical properties of PAN fibers before and after modification

| Program             | Breaking strength(N/mm <sup>2</sup> ) | Elongation at break (%) | Elasticity modulus (Mpa) |
|---------------------|---------------------------------------|-------------------------|--------------------------|
| Before modification | 39.8                                  | 26                      | 150.5                    |
| After modification  | 25.6                                  | 16                      | 164.2                    |

The kinetic equations are expressed as follows:

$$\ln(q_e - q_t) = \ln q_e - k_1 t \quad (Eq.1)$$

$$\frac{t}{q_t} = \frac{1}{k_2 q_e^2} + \frac{t}{q_e} \quad (Eq.2)$$

where  $q_t$  and  $q_e$  (mmol/g) are the amounts of adsorbates adsorbed at time  $t$  (min) and at equilibrium, respectively.  $k_1$  ( $\text{min}^{-1}$ ) and  $k_2$  ( $\text{g mmol}^{-1} \text{min}^{-1}$ ) are the rate constants of the two models, respectively.

Table S3. The kinetics parameters of Cr(VI) removal by the MoS<sub>2</sub>@PANI/PAN nanocomposite

| Pseudo-First-Order |                       |                      |                                |       | Pseudo-Second-Order  |                       |                     |       |
|--------------------|-----------------------|----------------------|--------------------------------|-------|----------------------|-----------------------|---------------------|-------|
| $C_0$<br>(mmol/L)  | $Q_{exp}$<br>(mmol/g) | $Q_{eq}$<br>(mmol/g) | $k_1$<br>( $\text{min}^{-1}$ ) | $R^2$ | $Q_{eq}$<br>(mmol/g) | $k_2$<br>(g/mmol min) | $h$<br>(mmol/g min) | $R^2$ |
| 2.0                | 1.73                  | 1.77                 | 0.08                           | 0.99  | 1.96                 | 0.06                  | 0.23                | 0.97  |

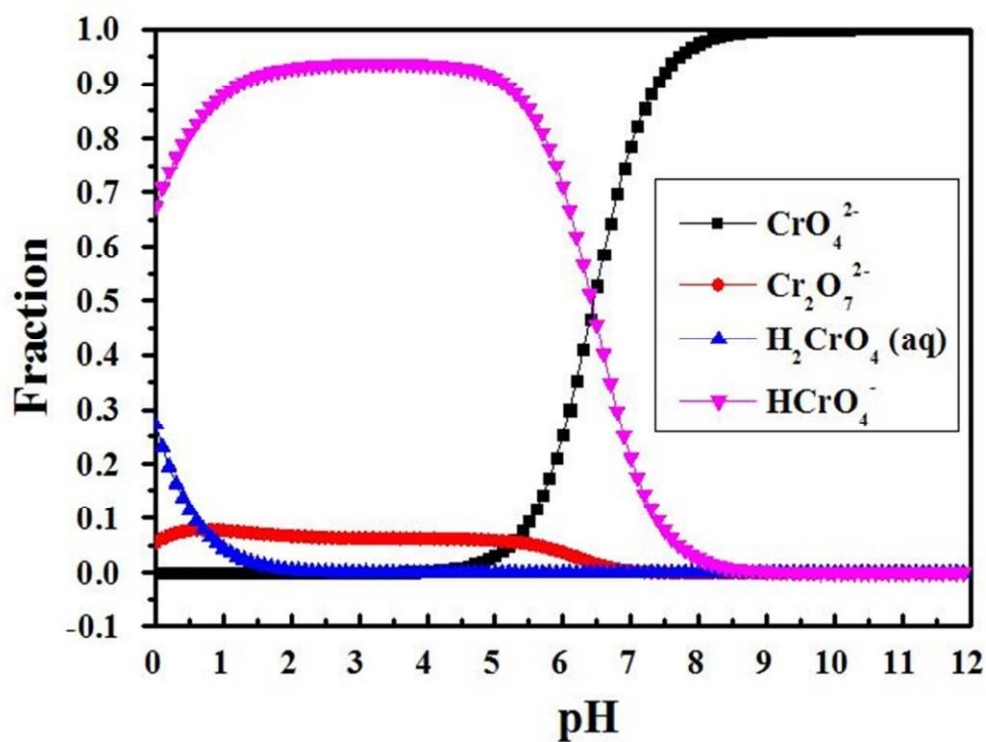

Figure S11. Cr species distribution at different pH values.

Adsorption isotherm models were applied to describe the adsorption behaviors between the liquid and solid phases. The primary theory of Langmuir isotherm model was based on the hypothesis of molecular layer adsorption, and there was no interaction among the adsorbed molecules, indicating the active sites on the adsorbents were equal for the adsorbed molecules. Whereas, the Freundlich isotherm model demonstrated the heterogeneous binding sites on the surface of adsorbents.

The form of the Langmuir isotherm is as Eq.3:

$$\frac{C_e}{q_e} = \frac{C_e}{q_m} + \frac{1}{q_m K_L} \quad (Eq.3)$$

where  $q_e$  (mmol/g) is the amount of adsorbates adsorbed at the equilibria,  $q_m$  (mmol/g) is the maximum adsorption capacity,  $C_e$  (mmol/L) is the equilibrium concentration of adsorbates in the solution and  $K_L$  (L/mmol) is the Langmuir adsorption constant.

The Freundlich adsorption equation is given as Eq.4:

$$q_e = K_f C_e^{1/n} \quad (Eq.4)$$

where  $K_f$  is the Freundlich adsorption coefficient, which is an index of the adsorption capacity and  $1/n$  refers to a constant depicting the adsorption intensity.

**Table S4.** The isothermal parameters of Cr(VI) removal by MoS<sub>2</sub>@PANI/PAN nanocomposite

| Langmuir model |                    |                   |       | Freundlich model |      |       |
|----------------|--------------------|-------------------|-------|------------------|------|-------|
| $T$ (K)        | $Q_{max}$ (mmol/g) | $K_L$<br>(L/mmol) | $R^2$ | $k_f$            | $n$  | $R^2$ |
| 298            | 5.90               | 94.7              | 0.999 | 28.5             | 1.92 | 0.976 |
| 308            | 6.45               | 102.2             | 0.999 | 30.9             | 1.95 | 0.972 |
| 318            | 6.57               | 113.3             | 0.999 | 30.6             | 2.01 | 0.966 |

The thermodynamic equations are expressed as follows:

$$\ln K_d = \frac{\Delta S^\circ}{R} - \frac{\Delta H^\circ}{RT} \quad (Eq.5)$$

$$\Delta G^\circ = -RT \ln K_d \quad (Eq.6)$$

where  $K_d$  (L/mmol) is the adsorption equilibrium constant obtained from Langmuir model,  $T$  (K) is the temperature, and  $R$  is the universal gas constant ( $\text{kJ mol}^{-1} \text{K}^{-1}$ ), respectively.

where  $K_d$  (L/mmol) is the adsorption equilibrium constant obtained from Langmuir model,  $T$  (K) is the temperature, and  $R$  is the universal gas constant ( $\text{kJ mol}^{-1} \text{K}^{-1}$ ), respectively.

**Table S5.** The thermodynamic parameters of Cr(VI) removal by  $\text{MoS}_2@\text{PANI}/\text{PAN}$  nanocomposite

| $K_d$<br>(L/mmol) |       |       | $\Delta H^\circ$<br>(kJ/mol) | $\Delta S^\circ$<br>(J/ mol·K) | $\Delta G^\circ$ (kJ/mol) |       |       |
|-------------------|-------|-------|------------------------------|--------------------------------|---------------------------|-------|-------|
| 298K              | 308K  | 318K  |                              |                                | 298K                      | 308K  | 318K  |
| 94.7              | 102.2 | 113.3 | 7.1                          | 61.5                           | -18.3                     | -18.9 | -19.6 |

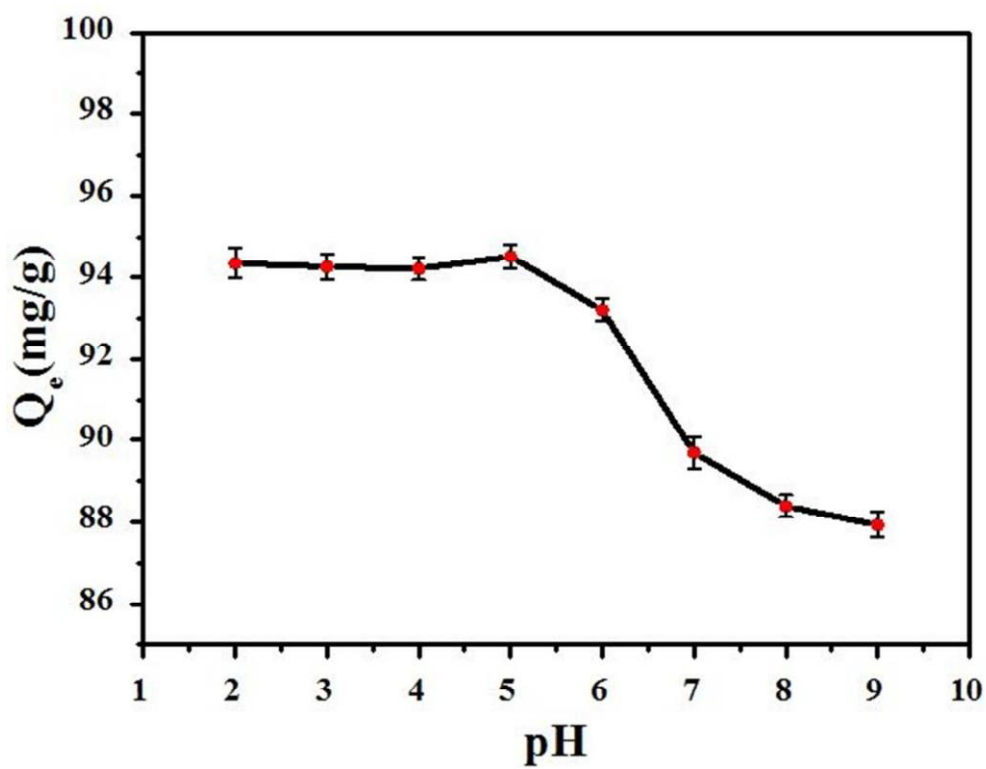

**Figure S12.** The effect of pH on the removal of humic acid (HA).

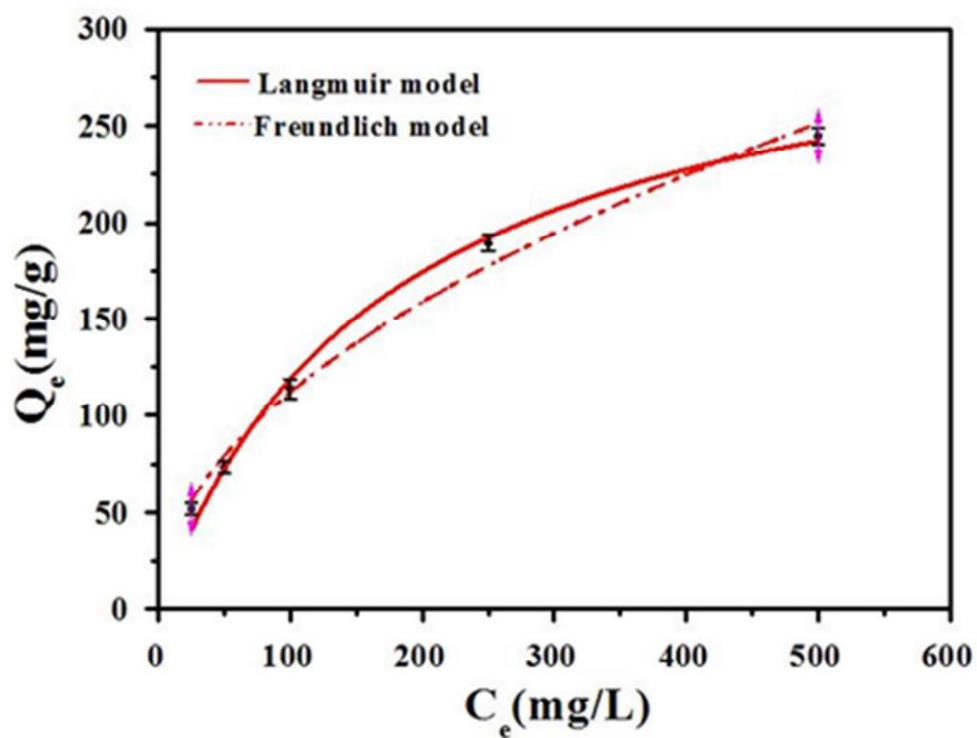

Figure S13. The isotherm of HA removal by MoS<sub>2</sub>@PANI/PAN nanocomposite.

Table S6. The geometrical parameters of complex

| Program                                 | E (a.u.) | $\Delta E$ (kJ/mol) | Bond length (Å) | Bond angle (°) |
|-----------------------------------------|----------|---------------------|-----------------|----------------|
| Single Cr atom                          | -84.13   | ---                 | ---             | ---            |
| PANI <sup>0</sup> PANI <sup>0</sup> -Cr | -1375.12 | ---                 | ---             | ---            |
|                                         | -1460.41 | -794.43             | 1.94            | 39.01          |



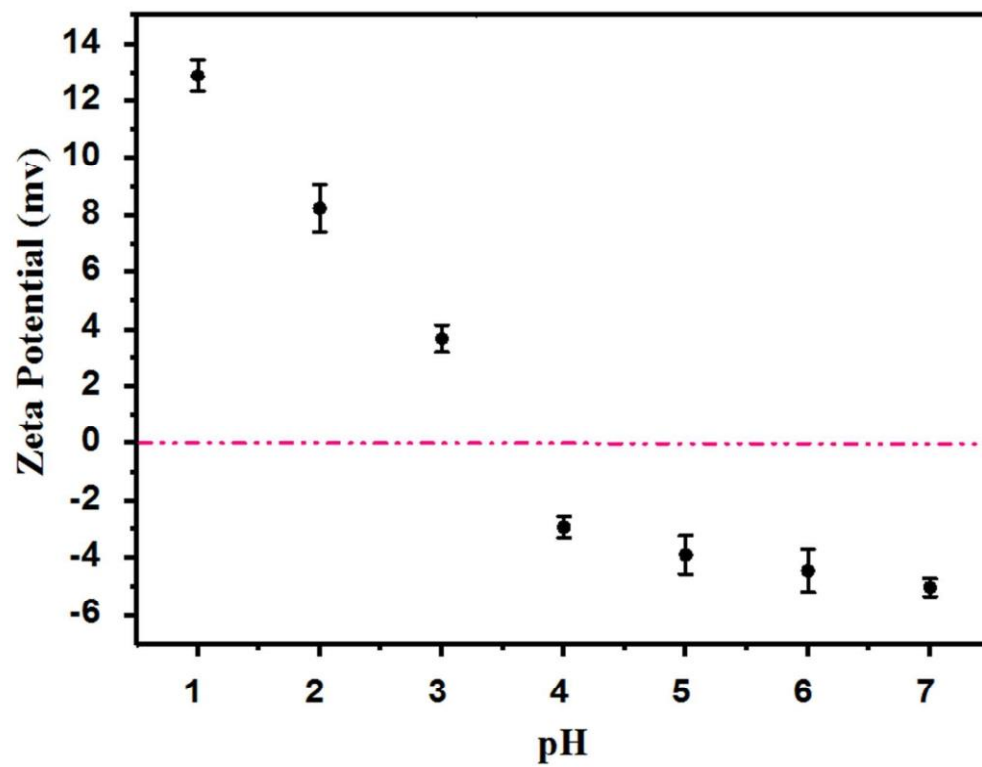

**Figure S14.** The zeta potential of MoS<sub>2</sub> nanoparticles at different pH values.

**Table S7.** Comparison of the Cr(VI) removal efficiency of the MoS<sub>2</sub>@PANI/PAN nanocomposite and other, previously reported materials

| Materials                                              |      | Removal capacity (mmol/g) | Reference |
|--------------------------------------------------------|------|---------------------------|-----------|
| Equilibrium time (h)                                   |      |                           |           |
| PANI/H-TNBs                                            | 5.0  | 3.0                       | 28        |
| PANI@ Mg/Al LDH                                        | 5.0  | 7.6                       | 38        |
| HA@PAN Hybrid Nanotubes                                | 0.17 | 1.2                       | 39        |
| AC modified PEI                                        | 3.3  | 7.7                       | 40        |
| Pyridine copolymer resin                               | 2.0  | 1.4                       | 41        |
| Fe <sub>3</sub> O <sub>4</sub> /PANI microspheres      | 1.2  | 3.8                       | 42        |
| Rare earth doped titanium dioxide coated carbon sphere | 6.0  | 1.6                       | 43        |
| Nitrogen-doped chitosan-Fe(III) composites             | 3.3  | 1.1                       | 44        |
| Al-substituted ferrihydrites                           | 0.66 | 0.77                      | 45        |
| MoS <sub>2</sub> @PANI/PAN nanocomposite               | 0.50 | 6.6                       | This work |
